# Supplementary material
Source: PubMed Central journal article supplement (PMC9646871)
Supplement: 41598_2022_21620_MOESM1_ESM.pdf [file 41598_2022_21620_MOESM1_ESM.pdf]

# SUPPLEMENTARY MATERIALS: TABLES AND FIGURES

## **A molecular signature of lung-resident CD8<sup>+</sup> T cells elicited by subunit vaccination**

**Running Title: Subunit vaccine-induced molecular signature of lung CD8<sup>+</sup> Trm**

Naveenchandra. Suryadevara<sup>1,2</sup>, Amrendra Kumar<sup>1,2</sup>, Xiang Ye<sup>2</sup>,  
Meredith Rogers<sup>2,4</sup>, John V. Williams<sup>2,4,5</sup>, John T. Wilson<sup>3</sup>, John Karijolic<sup>2</sup>  
& Sebastian Joyce<sup>1,2,6</sup>

<sup>1</sup>Department of Veterans Affairs, Tennessee Valley Healthcare Center, Nashville, Tennessee 37212, USA; <sup>2</sup>Department of Pathology, Microbiology, & Immunology, Vanderbilt University Medical Center, Nashville, Tennessee 37232, USA; <sup>3</sup>Department of Chemical and Biomolecular Engineering & Department of Biomedical Engineering, Vanderbilt University, Nashville, Tennessee 37212, USA; <sup>4</sup>Department of Paediatrics, University of Pittsburgh School of Medicine, Pittsburgh, Pennsylvania 15224

<sup>5</sup>Institute for Infection, Immunity, and Inflammation in Children (i4Kids), Pittsburgh, Pennsylvania 15224

<sup>6</sup>Corresponding author: Sebastian Joyce <sebastian.joyce@vumc.org >

## SUPPLEMENTARY TABLES

**TABLE S1. Cell yields post flow sort**

| pB7.2-reactive CD8 <sup>+</sup> T cell |     | Replicate 1<br>mouse 1–3 | Replicate 2<br>mouse 4–6 | Replicate 3<br>mouse 7–9 | Replicate 4<br>mouse 10–12 |
|----------------------------------------|-----|--------------------------|--------------------------|--------------------------|----------------------------|
| <b>LUNGS</b>                           |     |                          |                          |                          |                            |
| B8R <sub>70–78</sub> Trm               | IST | 5,482                    | 5,605                    | 2,408                    | 11,057                     |
| D1R <sub>808–817</sub> Trm             | IST | 8,097                    | 6,963                    | 1,246                    | 2,497                      |
| B8R <sub>70–78</sub> Tem               | MV  | 53,703                   | 24,458                   | 17,027                   | 51,366                     |
| D1R <sub>808–817</sub> Tem             | MV  | 77,087                   | 28,914                   | 6,732                    | 15,780                     |
| <b>SPLEEN</b>                          |     |                          |                          |                          |                            |
| B8R <sub>70–78</sub> Tcm               |     | 108,492                  | 42,327                   | 144,520                  | 124,000                    |
| D1R <sub>808–817</sub> Tcm             |     | 81,359                   | 41,277                   | 93,282                   | 57,000                     |

Each replicate was made of cells purified from three prime boost vaccinated mice. As Trm cell numbers were low, B8R<sub>70–78</sub> & D1R<sub>808–817</sub> of each memory type were pooled for RNAseq. Three-to-ten cells of each of three memory types and of each replicate were processed as described in Materials & Methods.

**Supplementary Tables S2–S4:** Gene ontology pathway analyses of pairwise comparison of the three lung CD8<sup>+</sup> T cell memory subsets. **Sheet 1**—IST Trm *versus* MV; **Sheet 2**—IST Trm *versus* splenic Tm; **Sheet 3**—MV Tem *versus* splenic Tm. Data are provided as a single Excel File

**TABLE S5. List of antibodies used in this study**

| <b>Antigen</b>     | <b>Fluorochrome/tag</b> | <b>Clone</b> | <b>Source</b>     | <b>Catalogue number</b> |
|--------------------|-------------------------|--------------|-------------------|-------------------------|
| B220               | FITC                    | RA3-6B2      | BD Biosciences    | 553088                  |
| B220               | PerCP-Cy5.5             | RA3-6B2      | BioLegend         | 103236                  |
| B220               | APC-Cy7                 | RA3-6B2      | BD Biosciences    | 552094                  |
| CD3 $\epsilon$     | APC                     | 145-2C11     | BioLegend         | 100306                  |
| CD8 $\alpha$       | FITC                    | 53-6.7       | BD Biosciences    | 553031                  |
| CD8 $\alpha$       | PerCP-Cy5.              | 53-6.7       | BD Biosciences    | 551162                  |
| CD16/CD32          | purified                | 93           | BioLegend         | 101302                  |
| CD45.2             | APC                     | 104          | Tonbo Biosciences | 20-0454-U100            |
| Ghost Violet 510   | V510                    | na           | Tonbo Biosciences | 13-0870-T100            |
| IFN- $\gamma$      | purified                | AN18         | BioLegend         | 517902                  |
| IFN- $\gamma$      | biotinylated            | R4-6A2       | BioLegend         | 505704                  |
| pB7.2 tetramer     | PE                      | custom       | in house          | na                      |
| pB7.2 tetramer     | APC                     | custom       | in house          | na                      |
| na, not applicable |                         |              |                   |                         |

**Table S6: Accession information for RNAseq data deposited at Sequence Read Archive (SRA)\***

| <b>Accession ID</b> | <b>Sample ID</b> | <b>Sample name**</b> | <b>Organism</b>     | <b>Deposit date &amp; time</b> |
|---------------------|------------------|----------------------|---------------------|--------------------------------|
| SAMN25818777        | 1538-AK-1        | IST Trm-1            | <i>Mus musculus</i> | 2022-02-09; 18:01              |
| SAMN25818778        | 1538-AK-2        | IST Trm-2            | <i>Mus musculus</i> | 2022-02-09; 18:01              |
| SAMN25818779        | 1538-AK-3        | IST Trm-3            | <i>Mus musculus</i> | 2022-02-09; 18:01              |
| SAMN25818780        | 1538-AK-4        | IST Trm-4            | <i>Mus musculus</i> | 2022-02-09; 18:01              |
| SAMN25818781        | 1538-AK-5        | MV Tem-1             | <i>Mus musculus</i> | 2022-02-09; 18:01              |
| SAMN25818782        | 1538-AK-6        | MV Tem-2             | <i>Mus musculus</i> | 2022-02-09; 18:01              |
| SAMN25818783        | 1538-AK-7        | MV Tem-3             | <i>Mus musculus</i> | 2022-02-09; 18:01              |
| SAMN25818784        | 1538-AK-8        | MV Tem-4             | <i>Mus musculus</i> | 2022-02-09; 18:01              |
| SAMN25818785        | 1538-AK-9        | Splenic Tcm-1        | <i>Mus musculus</i> | 2022-02-09; 18:01              |
| SAMN25818786        | 1538-AK-10       | Splenic Tcm-2        | <i>Mus musculus</i> | 2022-02-09; 18:01              |
| SAMN25818787        | 1538-AK-11       | Splenic Tcm-3        | <i>Mus musculus</i> | 2022-02-09; 18:01              |
| SAMN25818788        | 1538-AK-12       | Splenic Tcm-4        | <i>Mus musculus</i> | 2022-02-09; 18:01              |

\*SRA will release the deposited RNAseq data immediately upon acceptance of the manuscript

\*\*Tcm, central memory T cell; Tem, effector memory T cell; Trm, tissue resident memory T cell; MV, marginated vascular; IST, interstitial

## SUPPLEMENTARY FIGURES

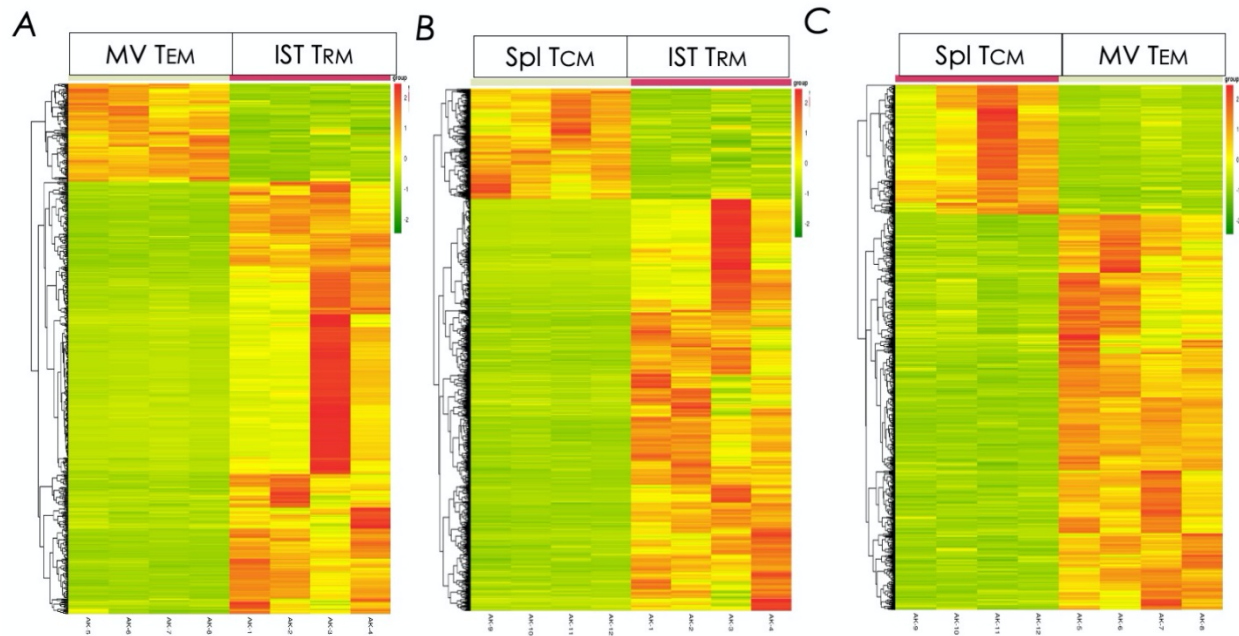

**Figure S1:** Heatmaps illustrating the relative expression of 17,000 gene transcripts differentially expressed within CD8<sup>+</sup> IST Trm, MV Tem, and splenic Tm cell subsets using bulk RNA-seq data. Gene clusters were ordered by K-means clustering analysis. Heatmaps were generated by comparing individual samples from each group MV Tem *vs.* IST Trm (A), splenic Tm *vs.* IST Trm (B), and splenic Tm *vs.* MV Tem cells. Red, up regulated genes; green, down regulated genes.

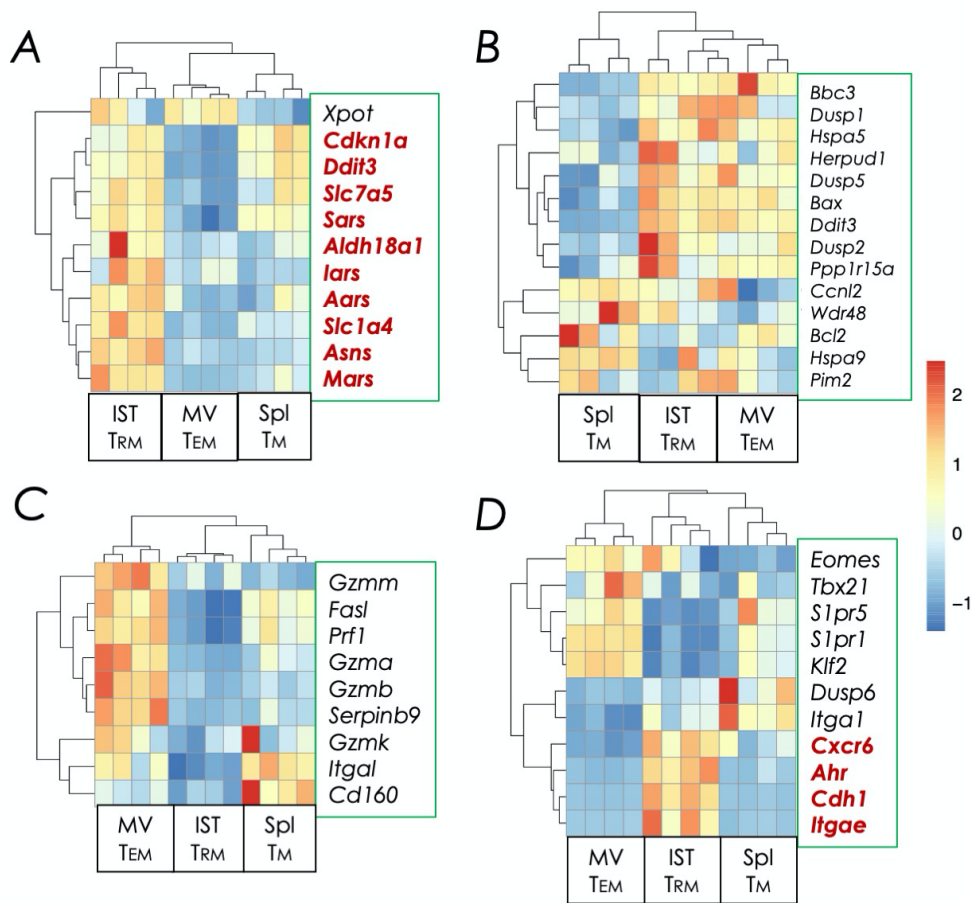

**Figure S2:** Heatmaps show the expression of selected genes. Expression was normalized as Z score to illustrate differentially expressed genes of individual samples comparing CD8<sup>+</sup> IST Trm, MV Tem, and splenic Tm cells. Gene sets shown here were those reported by Hayward et al. (*Nat. Immunol.* 21: 309–320, 2020). Trm-specific genes are indicated in red; red, up-regulated genes; blue, down regulated genes.
